# Supplementary material
Source: ML conference proceedings conference paper supplement (https://proceedings.neurips.cc/paper_files/paper/2023/hash/d191ba4c8923ed8fd8935b7c98658b5f-Abstract.html)
Supplement: Supplementary file 1 [file d191ba4c8923ed8fd8935b7c98658b5f-Supplemental-Conference.pdf]

## 528 A Denoising Diffusion Implicit Model with non-zero mean latent space

529 The forward process of a diffusion process with non-zero mean latent distribution  $\mathbf{y}_T \sim \mathcal{N}(f(\mathbf{x}), \mathbf{I})$  has a  
530 closed form representation:

$$q(\mathbf{y}_t | \mathbf{y}_0, f) = \mathcal{N}(\mathbf{y}_t; \sqrt{\bar{\alpha}_t} \mathbf{y}_0 + (1 - \sqrt{\bar{\alpha}_t}) f(\mathbf{x}), (1 - \bar{\alpha}_t) \mathbf{I}), \quad (\text{A.1})$$

531 which could be reparameterized as:

$$\mathbf{y}_t = \sqrt{\bar{\alpha}_t} \mathbf{y}_0 + (1 - \sqrt{\bar{\alpha}_t}) f(\mathbf{x}) + \sqrt{1 - \bar{\alpha}_t} \boldsymbol{\epsilon} \quad (\text{A.2})$$

532 Then, similar to the DDIM, we define a Non-Markovian forward process with  $\sigma_t \geq 0, t = 1 : T$ .

$$q_\sigma(\mathbf{y}_{1:T} | \mathbf{y}_0, f) := q_\sigma(\mathbf{y}_T | \mathbf{y}_0, f) \prod_{t=2}^T q_\sigma(\mathbf{y}_{t-1} | \mathbf{y}_t, \mathbf{y}_0, f) \quad (\text{A.3})$$

533 Where  $q_\sigma(\mathbf{y}_T | \mathbf{y}_0, f) = \mathcal{N}(\mathbf{y}_T; \sqrt{\bar{\alpha}_T} \mathbf{y}_0 + (1 - \sqrt{\bar{\alpha}_T}) f(\mathbf{x}), (1 - \bar{\alpha}_T) \mathbf{I})$  and for all  $t > 1$ .

$$q_\sigma(\mathbf{y}_{t-1} | \mathbf{y}_t, \mathbf{y}_0, f) = \mathcal{N} \left( \mathbf{y}_{t-1}; \sqrt{\bar{\alpha}_{t-1}} \mathbf{y}_0 + (1 - \sqrt{\bar{\alpha}_{t-1}}) f(\mathbf{x}) + \sqrt{1 - \bar{\alpha}_{t-1} - \sigma_t^2} \cdot \tilde{\boldsymbol{\epsilon}}, \sigma_t^2 \mathbf{I} \right), \quad (\text{A.4})$$

$$\tilde{\boldsymbol{\epsilon}} = \frac{1}{\sqrt{1 - \bar{\alpha}_t}} \cdot (\mathbf{y}_t - \sqrt{\bar{\alpha}_t} \mathbf{y}_0 - (1 - \sqrt{\bar{\alpha}_t}) f(\mathbf{x}))$$

534 We can prove that the sampling process defined by Eq. (A.3) and Eq. (A.4) has the same *marginal distribution*  
535 as the closed-form sampling process in Eq. (A.1) by the following Lemma:

536

537 **Lemma A.1.** For  $q_\sigma(\mathbf{y}_{1:T} | \mathbf{y}_0, f)$  defined in Eq. (A.3) and  $q_\sigma(\mathbf{y}_{t-1} | \mathbf{y}_t, \mathbf{y}_0, f)$  defined in Eq. (A.4), we have:

$$q_\sigma(\mathbf{y}_t | \mathbf{y}_0, f) = \mathcal{N}(\mathbf{y}_t; \sqrt{\bar{\alpha}_t} \mathbf{y}_0 + (1 - \sqrt{\bar{\alpha}_t}) f(\mathbf{x}), (1 - \bar{\alpha}_t) \mathbf{I}) \quad (\text{A.5})$$

538 *Proof.* Assume for any  $t \leq T$ , if Eq. (A.5) is true, the following is also true:

$$q_\sigma(\mathbf{y}_{t-1} | \mathbf{y}_0, f) = \mathcal{N}(\mathbf{y}_{t-1}; \sqrt{\bar{\alpha}_{t-1}} \mathbf{y}_0 + (1 - \sqrt{\bar{\alpha}_{t-1}}) f(\mathbf{x}), (1 - \bar{\alpha}_{t-1}) \mathbf{I}), \quad (\text{A.6})$$

539 then we can prove the statement with an induction argument for  $t$  from  $T$  to 1, since the base case ( $t = T$ )  
540 already holds.

541 First, we have that:

$$q_\sigma(\mathbf{y}_{t-1} | \mathbf{y}_0) := \int_{\mathbf{y}_t} q_\sigma(\mathbf{y}_t | \mathbf{y}_0, f) q_\sigma(\mathbf{y}_{t-1} | \mathbf{y}_t, \mathbf{y}_0, f) d\mathbf{y}_t, \quad (\text{A.7})$$

542 and

$$q_\sigma(\mathbf{y}_t | \mathbf{y}_0, f) = \mathcal{N}(\mathbf{y}_t; \sqrt{\bar{\alpha}_t} \mathbf{y}_0 + (1 - \sqrt{\bar{\alpha}_t}) f(\mathbf{x}), (1 - \bar{\alpha}_t) \mathbf{I}) \quad (\text{A.8})$$

$$q_\sigma(\mathbf{y}_{t-1} | \mathbf{y}_t, \mathbf{y}_0, f) = \mathcal{N} \left( \mathbf{y}_{t-1}; \sqrt{\bar{\alpha}_{t-1}} \mathbf{y}_0 + (1 - \sqrt{\bar{\alpha}_{t-1}}) f(\mathbf{x}) + \sqrt{1 - \bar{\alpha}_{t-1} - \sigma_t^2} \cdot \tilde{\boldsymbol{\epsilon}}, \sigma_t^2 \mathbf{I} \right), \quad (\text{A.9})$$

$$\tilde{\boldsymbol{\epsilon}} = \frac{1}{\sqrt{1 - \bar{\alpha}_t}} \cdot (\mathbf{y}_t - \sqrt{\bar{\alpha}_t} \mathbf{y}_0 - (1 - \sqrt{\bar{\alpha}_t}) f(\mathbf{x})).$$

543 According to [63] Eq. (2.115), we have that  $q_\sigma(\mathbf{y}_{t-1} | \mathbf{y}_t, \mathbf{y}_0, f)$  is Gaussian, with mean  $\boldsymbol{\mu}_{t-1}$  and co-variance  
544  $\boldsymbol{\Sigma}_{t-1}$ :

$$\boldsymbol{\mu}_{t-1} = \sqrt{\bar{\alpha}_{t-1}} \mathbf{y}_0 + (1 - \sqrt{\bar{\alpha}_{t-1}}) f(\mathbf{x}) \quad (\text{A.10})$$

$$+ \sqrt{1 - \bar{\alpha}_{t-1} - \sigma_t^2} \left( \frac{\sqrt{\bar{\alpha}_t} \mathbf{y}_0 + (1 - \sqrt{\bar{\alpha}_t}) f(\mathbf{x}) - \sqrt{\bar{\alpha}_t} \mathbf{y}_0 - (1 - \sqrt{\bar{\alpha}_t}) f(\mathbf{x})}{\sqrt{1 - \bar{\alpha}_t}} \right)$$

$$= \sqrt{\bar{\alpha}_{t-1}} \mathbf{y}_0 + (1 - \sqrt{\bar{\alpha}_{t-1}}) f(\mathbf{x}). \quad (\text{A.11})$$

545

$$\boldsymbol{\Sigma}_{t-1} = \sigma_t^2 \mathbf{I} + \frac{1 - \bar{\alpha}_{t-1} - \sigma_t^2}{1 - \bar{\alpha}_t} (1 - \bar{\alpha}_t) \mathbf{I} = (1 - \bar{\alpha}_t) \mathbf{I}. \quad (\text{A.12})$$

546 Therefore, Eq. (A.6) holds. Following the induction, the lemma is proved.  $\square$

547 In our implementation, we follow DDIM [32] setting  $\sigma_t = 0$ . The resulting model becomes an implicit  
548 probabilistic model [64], where the generation process become deterministic given  $\mathbf{y}_T$ .

549 **B t-SNE visualization of the DDIM generation process**

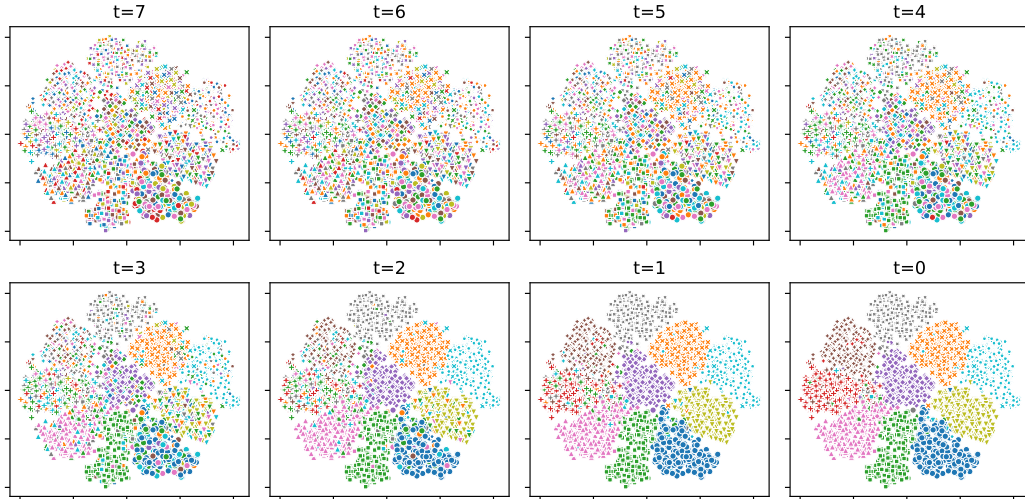

Figure B.1: The t-SNE visualization of the CLIP feature space during the reverse generation process of a conditional diffusion model using an 7-step DDIM on the CIFAR-10 dataset. The process begins at time  $t = 7$ , with the sampling of the latent representation of the label from the latent distribution  $\mathcal{N}(f_q(\mathbf{x}), \mathbf{I})$ . Through a series of multi-step reverse operations, the latent distribution is transformed into the conditional distribution of labels. The data points are color-coded according to the entry with the highest value in intermediate/final label vectors, and the ground truth class labels are represented by distinct markers.

550 **C Experimental setup and details**

551 **C.1 Real-world dataset details**

552 **WebVision** comprising 2.4 million images that were crawled using Google and Flickr search engines, with the  
553 ILSVRC12 taxonomy. Following prior studies, we trained our model on the initial 50 classes from the Google  
554 image subset of Webvision and tested it on the validation sets of both Webvision and ILSVRC12.

555 **Food-101N** consists of 310k food images collected from the internet with the Food-101 [65] taxonomy, and has  
556 an estimated label noise level of 20%, making it an ideal dataset to evaluate the robustness of our method under  
557 real-world noisy labels. We assessed the classification accuracy on the curated label set of Food-101, which  
558 contains around 25k images.

559 **Clothing1M** contains 1 million images of clothes obtained from shopping websites. Based on the keywords in  
560 the surrounding text, the images are automatically classified into 14 classes with  $\sim 40\%$  estimated noise level.  
561 The dataset includes a clean training set, validation set, and test set with manually refined labels, consisting of  
562 approximately 47.6k, 14.3k, and 10k pictures, respectively. We discarded the clean training set and only used  
563 the noisy label data for training.

564 **C.2 Implementation details**

565 To present the hyperparameter settings of our neural network, we first give a description of our neural network  
566 design. As shown in Figure C.1, the network consists of a frozen  $f_p$  encoder, a ResNet encoder, and a series of  
567 feed forward layers. Features encoded by the two encoders are combined with time embedding via hadamard  
568 product and passed through a series of feed-forward networks, batch normalization, and softplus activation to  
569 predict the noise term  $\epsilon_\theta$ .

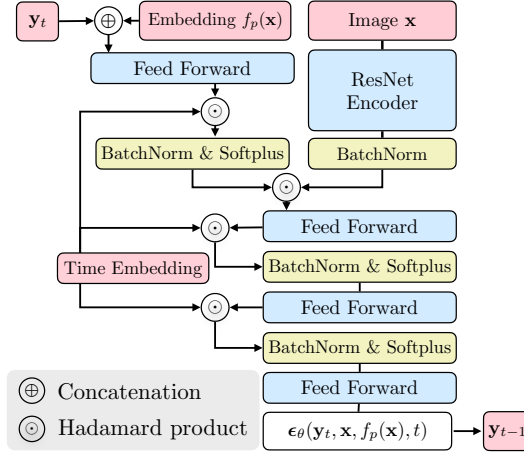

Figure C.1: The network architecture for conditional diffusion models. The input to the network consists of four elements:  $y_t$ ,  $f_p(x)$ ,  $x$ , and the time embedding for  $t$ , represented by pink blocks. The blue blocks in the figure represent the trainable network components.

570 In our experiments, we use ResNet34 for CIFAR10 and CIFAR100, and use ResNet50 for real-world datasets as  
 571 the trainable encoder (blue ResNet block in Figure C.1). The dimensions of all feed-forward layers are set to  
 572 512 for CIFAR datasets and 1024 for real-world datasets, respectively. We train LRA-diffusion models for 200  
 573 epochs with Adam optimizer. The batch size is 256. We used a learning rate schedule that included a warmup  
 574 phase followed by a half-cycle cosine decay. The initial learning rate is set to 0.001. Following [15], we applied  
 575 data augmentation in the training, including resizing, random horizontal flip, and random cropping. To retrieve  
 576 the nearest neighbors, we set  $k=10$  based on our tests using a range of  $k$  values from 1 to 100 on the validation  
 577 sets. The KNN accuracy remained relatively stable for  $k$  between 10 and 50, and then starts to decline due to  
 578 reduced label consistency among neighbors. Based on these results, we infer that our LRA diffusion model is  
 579 less sensitive to variations in  $k$  within this range. All experiments are conducted using four NVIDIA Titan V  
 580 GPUs.

## 581 D Additional ablation study

### 582 D.1 Classifier feature conditioning for accuracy enhancement

583 To demonstrate how our method can enhance a trained classifier’s performance by using its features as conditional  
 584 information, we conduct an ablation study examining the impact of conditional diffusion and KNN on the trained  
 585 classifier. Specifically, we train classifiers, denoted as  $\eta(x)$ , using the standard method at various noise levels.  
 586 We then remove the classification head and utilize the remaining model  $f_{\eta}$  as the  $f_p$  encoders in our conditional  
 587 diffusion models.

588 The experimental results shown in Figure D.1 indicate that these techniques can improve test accuracy. We  
 589 observe that when the noise level is below 55%, the conditional diffusion model (green) achieves a  $\sim 1\%$   
 590 improvement over the standard method. Moreover, when the LRA method is applied concurrently (purple), test  
 591 accuracy can be further enhanced. This improvement occurs because learning from neighbors’ labels reduces  
 592 the noise level during training, as evidenced by the comparison between KNN results (blue) and clean label  
 593 percentage (gray).

594 However, when the noise level exceeds 55%, the use of diffusion and LRA-diffusion methods does not seem  
 595 advantageous. This limitation arises because the distribution of labels in the neighborhood becomes too corrupted  
 596 for KNN to effectively improve the proportion of clean labels during training, as illustrated by the intersection of  
 597 the blue and gray curves in the figure. We argue this does not diminish the practical value of our method because  
 598 a dataset with more than 50% label noise is not meaningful in practice.

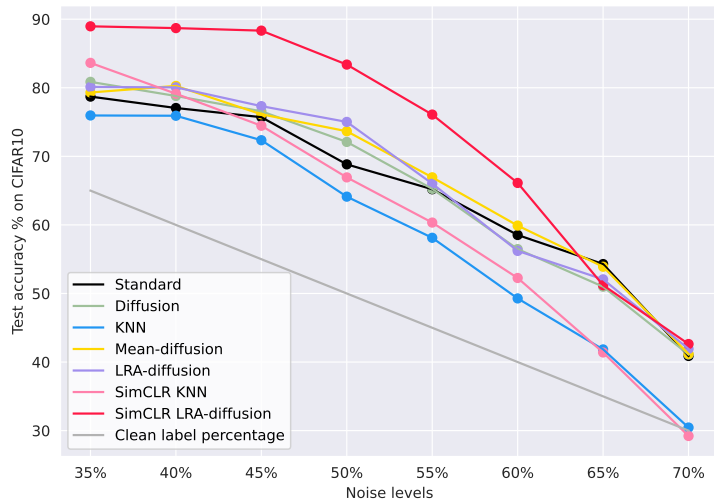

Figure D.1: Test accuracy of seven methods on the CIFAR-10 dataset with different levels of PMD label noise. Other than the already introduced method names, here *Diffusion* is a conditional diffusion model using the feature  $f_\eta$ . The clean label percentage is represented by the gray line.

## 599 D.2 Effects of different pseudo-label construction strategies

600 We also conduct comparative experiments using another method that utilizes neighbor labels: replacing the  
 601 one-hot label vector with the mean vector of the neighbor’s labels as the prediction target, which we call  
 602 Mean-diffusion. We found that it can achieve higher accuracy when the noise level is higher than 55%. This  
 603 may be due to the increase in the diversity of neighbor labels. The sampling-based LRA-diffusion will need  
 604 to learn a more complex multi-modal distribution, but Mean-diffusion only needs to learn a point estimate.  
 605 However, when the noise level is lower than 55%, we found that LRA-diffusion is slightly more accurate than  
 606 Mean-diffusion. A possible explanation is that the distribution of  $y_0$  in LRA-diffusion contains only  $n$  one-hot  
 607 labels. In contrast,  $y_0$  in Mean-diffusion is more diverse ( $n^k/k!$  possible mean vectors for  $n$  classes and  $k$   
 608 neighbors). In conclusion, LRA-diffusion has higher performance with less noisy labels. On the other hand,  
 609 Mean-diffusion has faster and more stable convergence and is more robust for high noise level. However, they  
 610 tend to perform similarly when the noise level is too high or too low since neighbors’ labels will become the  
 611 same or too corrupted.

## 612 D.3 Robustness of pre-trained encoder conditioning

613 Finally, we use the SimCLR model as the encoder  $f_p$  in our conditional diffusion model (listed as SimCLR  
 614 LRA-diffusion in Figure D.1), to showcase the effectiveness of our proposed LRA-diffusion method in utilizing  
 615 prior knowledge from pre-trained image representations to enhance the test accuracy and robustness. The  
 616 experimental results (red) show that its test accuracy significantly surpasses other settings until the noise level  
 617 reaches 65%. Beyond this point, the labels in the neighborhood become too corrupted to provide additional  
 618 supervision information.
